1                    **Analysis of Spleen Histopathology, Splenocyte**  
2                    **composition and Hematological Parameters in Mice**  
3                    **Infected with *Plasmodium berghei* K173**

4  
5                    **Huajing Wang<sup>a,b</sup>, Shuo Li<sup>a,b</sup>, Zhao Cui<sup>a</sup>, Tingting Qin<sup>a,b</sup>, Hang Shi<sup>a</sup>, Ji Ma<sup>a,b</sup>,**  
6                    **Lanfang Li<sup>a</sup>, Guihua Yu, Tingliang Jiang<sup>a,b</sup> and Canghai Li<sup>a\*</sup>**

7  
8                    <sup>a</sup> Tang Center for Herbal Medicine Research, China Academy of Traditional Chinese  
9                    Medical Sciences, Beijing, China

10                    <sup>b</sup> Artemisinin Research Center and Institute of Chinese Materia Medica, China  
11                    Academy of Traditional Chinese Medical Sciences, Beijing, China

12                    \* Correspondence to: Dr. Canghai Li, Tang Center for Herbal Medicine Research,  
13                    Institute of Chinese Materia Medica, China Academy of Chinese Medical Sciences,  
14                    No. 16 Dongzhimen Nanxiaojie, Dongcheng District, Beijing 100700, China. Tel:  
15                    (+86) 10-6404-1008, Fax: (+86) 10-6404-1008, E-mail: [chli@icmm.ac.cn](mailto:chli@icmm.ac.cn)

16  
17                    **ABSTRACT** Malaria is a fatal disease that presents clinically as a continuum of  
18                    symptoms and severity, which are determined by complex host-parasite interactions.  
19                    Clearance of infection is believed to be accomplished by the spleen and mononuclear  
20                    phagocytic system (MPS), both in the presence and absence of artemisinin treatment.  
21                    The spleen filters infected RBCs from circulation through immune-mediated  
22                    recognition of the infected RBCs followed by phagocytosis. Using different strains of  
23                    mice infected with *P. berghei* K173 (PbK173), the mechanisms leading to  
24                    splenomegaly, histopathology, splenocyte activation and proliferation, and their  
25                    relationship to control of parasitemia and host mortality were examined. Survival time  
26                    of mice infected with PbK173 varied, although the infection was uniformly lethal.  
27                    Mice of the C57BL/6 strain were the most resistant, while mice of the strain ICR were  
28                    the most susceptible. BALB/c and KM mice were intermediate. In the course of  
29                    PbK173 infection, both strains of mice experienced significant splenomegaly.

30 Parasites were observed in the red pulp at 3 days post infection in all animals. All  
31 spleens retained late trophozoite stages as well as a fraction of earlier ring-stage  
32 parasites. The percentages of macrophages in infected C57BL/6 and KM mice were  
33 higher than uninfected mice on 8 dpi. Spleens of infected ICR and KM mice exhibited  
34 structural disorganization and remodeling. Furthermore, parasitemia was significantly  
35 higher in KM versus C57BL/6 mice at 8 dpi. The percentages of macrophages in ICR  
36 infected mice were lower than uninfected mice, and the parasitemia was higher than  
37 other strains. The results presented here demonstrate the rate of splenic mechanical  
38 filtration and the splenic macrophages likely contribute to an individual's total  
39 parasite burden. This in turn can influence the pathogenesis of malaria. Finally,  
40 different genetic backgrounds of mice have different splenic mechanisms for  
41 controlling malaria infection.

42 **KEYWORDS** Malaria, control infection, spleen filtration, splenocyte

43

44

45 *Plasmodium falciparum* parasites cause lethal infections worldwide, especially in  
46 Africa (1). Reducing this disease burden continues to rely heavily on the availability  
47 and proper use of effective antimalarial drugs. Artemisinin and its derivatives are  
48 sesquiterpene lactones with potent activity against nearly all blood stages of *P.*  
49 *falciparum*. There is a natural and complex variation in the pathogenesis and clinical  
50 presentation of malaria, which is influenced by host age, immunity and genetic  
51 background, as well as by environmental conditions and parasite genetics (2,3). Host  
52 immunity and genetic factors are estimated to account for one quarter of the total  
53 variability in malaria severity (4,5). Host defense mechanisms such as removal of  
54 circulating parasites by the spleen and mononuclear phagocytic system (MPS) are  
55 thought to play a major role in rapid control of infection (6), in the presence or  
56 absence of artemisinin treatment (7).

57 The function of the spleen is to remove senescent erythrocytes (RBCs) and  
58 circulating foreign material such as bacteria or cellular debris (8). The structure of the  
59 spleen is complex with 2 overlapping blood circulations—a rapid flow by-pass, called

60 the fast closed circulation, which accommodates roughly 90% of the splenic blood  
61 flow (100–300 mL/min in a healthy adult), and a slow open circulation in which the  
62 blood is filtered through narrow inter-endothelial slits (9,10). In the slow open  
63 microcirculation, RBCs navigate through the cords of the red pulp before returning to  
64 the vascular beds by squeezing between endothelial cells in the sinus walls (11-13).  
65 Crossing splenic inter-endothelial slits poses the greatest demand on RBC  
66 deformability in the body (14) and is believed to result in the retention of less  
67 malleable RBCs or in removal of intraerythrocytic bodies. In malaria, the spleen  
68 filters infected RBCs from circulation by physical selection as well as  
69 immune-mediated recognition and phagocytosis of infected RBCs (15). These  
70 processes play a central role in the clearance of circulating malaria parasites (6). The  
71 rate of splenic mechanical filtration may be one factor affecting an individual's total  
72 parasite burden and the pathogenesis of malaria. Understanding the role of the spleen  
73 in host defense may shed additional light on the variation in human susceptibility to  
74 malaria and offer insights into possible mechanisms of malaria pathogenesis.

75 In the present study, the host defense against blood-stage malaria was examined by  
76 using different strains of mice infected with *P. berghei* K173 (PbK173), a rodent-lethal  
77 strain of malaria. Parasitemia and survival were measured to monitor the course of  
78 infection in C57BL/6, BALB/C, ICR, and KM mice. Since C57BL/6 mice were found  
79 to be more resistant to this infection, parameters indicative of a protective host  
80 response to infection were also characterized in the four strains mice. These included  
81 splenomegaly, histopathology, splenocyte subsets, hematological parameters.

## 82 **RESULTS**

### 83 **Progression of infection with PbK173 in mice**

84 Mice (18~22g) were purchased from Weitonglihua, and were inoculated with  $10^7$  *P.*  
85 *berghei* K173 infected erythrocytes in 200  $\mu$ L of sterile saline buffer i.p. Mice were  
86 monitored daily for any signs of malaria, including parasitemia and behavioral  
87 changes, compared to uninfected controls.

88

89

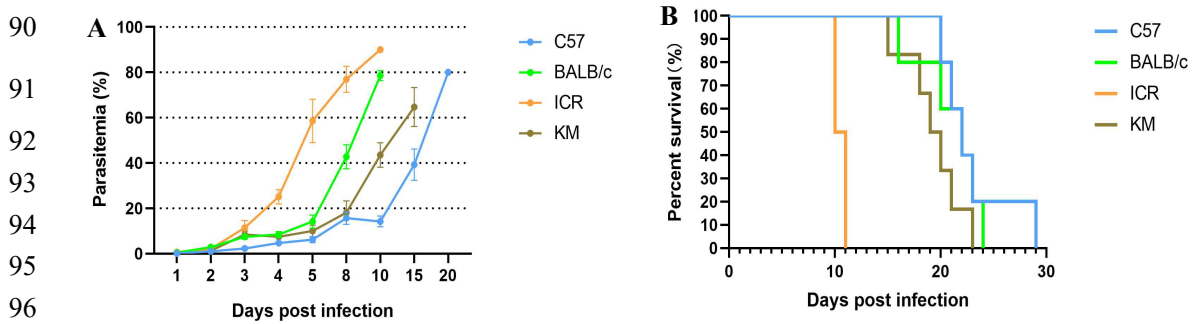

103 FIG 1: Parasitemia and survival curves in C57BL/6, BALB/c, ICR and KM mice  
104 following PbK173 infection. A: The percentage of parasitemia is presented as the  
105 arithmetic mean of each mouse strain  $\pm$  SD. B: Survival of mice without treatment  
106 (n=6) as a function of days post infection with PbK173.  
107

108 The combination of different mouse strains and parasites resulted in different  
109 disease outcomes following infection. BALB/c, ICR and KM mice developed  
110 infection with parasites observed in the blood as early as 1 dpi, whereas C57 mice  
111 converted at 2 dpi. Parasitemia was progressive in all groups (Fig. 1A). On 5 dpi, the  
112 parasitemia in ICR mice was 58.6%, 90% on the 8 dpi, and all animals died between  
113 9-11 dpi (Fig. 1B). In BALB/c mice, parasitemia approached 50% by 8 dpi, and  
114 peaked at 80% on 10 dpi. The BALB/c mice all succumbed between 16-24 dpi. On  
115 the 15th day, the highest parasitemia of the KM mice was 65%, and the animals all  
116 died between 15-23 dpi. The parasitemia of C57 mice was close to 50% on the 17th  
117 day, and the highest parasitemia reached 80% on the 20th day. All C57 mice died  
118 from malaria by 29 dpi.

119 It was observed that C57 mice were more resistant to infection than the other  
120 strains examined, as evidenced by the latest peak parasitemia and prolonged survival.  
121 The highest parasitemia of KM mice was the lowest observed, but its survival was  
122 shorter than that of C57BL/6 mice. The highest parasitemia of ICR mice was higher  
123 than other strains, although these mice succumbed the fastest.

### 124 Hematological Parameters

125 In this study, RBC counts (mean  $\pm$  SD,  $10^{12}/L$ ) for uninfected control mice were as  
126 follows: C57BL/6 (10.01 $\pm$ 0.25), BALB/c (7.93 $\pm$ 1.01), ICR (8.16 $\pm$ 0.16), KM  
127 (8.64 $\pm$ 0.29). These values are within normal ranges, as reported previously. By 5 dpi,,  
128

123 all strains of mice presented with anaemia, thrombocytopenia, and leukocytosis  
124 (Table 1).

125 Malaria infections induce lymphocytopenia and an increase in neutrophils, which is  
126 indicative of systemic inflammation (16). In all 4 strains of mice, the percentages of  
127 lymphocytes decreased compared to the baseline values starting from 1 dpi. In ICR  
128 mice, the decrease progressed significantly over the first 3 days. The  
129 lymphocytopenia progressed slowly in BALB/c and KM mice on the 2nd-3rd day of  
130 infection (Fig. 2A). In all mice, the percentages of neutrophils increased relative to  
131 uninfected control mice starting from 1 dpi (Fig. 2B).

132

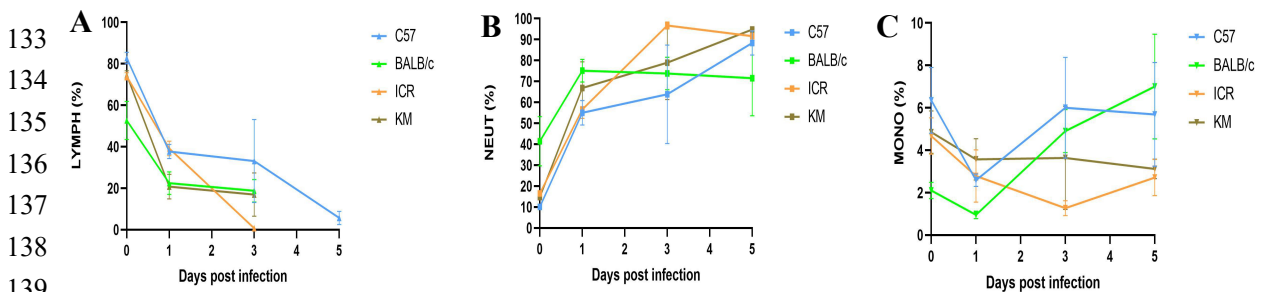

140 FIG 2: Effects of PbK173 infection on hematological parameters in C57BL/6,  
141 BALB/c, ICR and KM mice. A: Lymphocytes B: Neutrophils C: Monocytes.

142

143 The percentages of monocytes decreased compared with baseline values on at 1 dpi  
144 for all infected groups. But on 5 dpi, the percentages of monocytes in BALB/c  
145 ( $7.00 \pm 2.46$ ,  $p < 0.05$ ) and C57BL/6 ( $5.68 \pm 2.45$ ,  $p > 0.05$ ) mice were increased.

146 In contrast, monocyte counts decreased in ICR ( $2.71 \pm 0.85$ ,  $p < 0.05$ ) and KM  
147 ( $3.11 \pm 0.46$ ,  $p < 0.05$ ) mice (Fig. 2C).

Table 1: Effects of PbK173 infection on some hematological parameters in infected mice on 5 dpi.

| Hematological parameters  | C57BL/6       |                  | BALB/c        |                  | ICR           |                  | KM            |                  |
|---------------------------|---------------|------------------|---------------|------------------|---------------|------------------|---------------|------------------|
|                           | Uninfected    | Infected         | uninfected    | infected         | uninfected    | infected         | uninfected    | infected         |
| PLT (10 <sup>9</sup> /L)  | 1278.83±89.60 | 285.00±34.88↓*** | 1310.50±57.76 | 312.33±19.59↓*** | 1635.67±68.14 | 296.00±33.80↓*** | 1476.17±99.99 | 341.33±31.87↓*** |
| RBC (10 <sup>12</sup> /L) | 10.01±0.25    | 7.75±0.62↓***    | 7.93±1.01     | 6.62±0.37↓*      | 8.16±0.16     | 3.39±0.35↓***    | 8.64±0.29     | 4.44±0.34↓***    |
| HGB (g/L)                 | 149.67±2.66   | 113.83±8.45↓***  | 132.33±12.07  | 101.50±4.42↓*    | 137.17±4.26   | 60.00±6.96↓***   | 129.67±5.98   | 68.83±4.92↓***   |
| HCT (%)                   | 47.23±0.96    | 37.78±3.03↓***   | 40.40±3.28    | 32.58±1.33↓*     | 42.48±1.10    | 21.27±2.19↓***   | 42.67±2.02    | 24.77±1.86↓***   |
| MCV (fL)                  | 46.52±0.43    | 48.40±0.71↑***   | 45.02±0.67    | 49.22±1.48↑*     | 51.77±1.33    | 62.72±3.15↑***   | 48.75±0.83    | 56.26±1.12↑***   |
| MCH (pg)                  | 14.71±0.07    | 14.56±0.24       | 14.73±0.15    | 15.46±0.63↑*     | 16.86±0.35    | 17.55±0.76       | 15.18±0.35    | 15.75±0.12↑*     |
| MCHC (g/L)                | 316.83±2.04   | 301.17±2.14↓***  | 327.17±4.35   | 310.50±5.17↓***  | 321.67±3.26   | 283.83±5.49↓***  | 310.67±3.38   | 279.00±5.66↓***  |
| RDW-CV (%)                | 17.35±.26     | 16.20±0.83↓*     | 19.03±0.99    | 16.72±0.92↓*     | 15.85±0.32    | 19.97±1.21↓*     | 16.75±0.57    | 15.83±1.64       |
| RDW-SD (fL)               | 22.80±0.59    | 24.50±1.16↑*     | 25.82±2.22    | 26.87±1.49       | 26.70±0.84    | 41.11±4.13↑***   | 27.27±0.74    | 31.98±1.85↑***   |
| WBC (10 <sup>9</sup> /L)  | 2.74±0.39     | 5.84±2.16↑*      | 4.37±0.93     | 8.64±1.95↑*      | 2.52±0.35     | 5.63±1.64↑*      | 1.65±0.30     | 3.45±0.43↑***    |
| NEUT (%)                  | 10.13±0.4     | 88.33±5.83↑***   | 32.68±9.50    | 76.53±10.66↑***  | 16.50±1.07    | 91.65±2.59↑***   | 14.78±1.31    | 94.77±1.04↑***   |
| LYMPH (%)                 | 82.80±2.78    | 5.71±3.13↓***    | 52.68±9.16    | ---↓***          | 73.98±1.77    | ---↓***          | 74.57±2.09    | ---↓***          |
| MONO (%)                  | 6.35±1.55     | 5.68±2.45        | 2.10±0.38     | 7.00±2.46↑*      | 4.66±0.85     | 2.71±0.85↓*      | 4.85±1.01     | 3.11±0.46↓*      |
| EO (%)                    | 1.47±0.67     | 0.47±0.38↓*      | 2.13±0.59     | 1.33±0.68        | 4.06±0.53     | 3.98±2.73        | 4.60±1.66     | 0.71±0.24↓*      |
| BASO (%)                  | 0.32±0.23     | 0.63±0.23        | 0.16±0.05     | 0.38±0.04↑*      | 0.25±0.20     | 0.45±0.08        | 0.51±0.17     | 0.58±0.20        |

Values are given as mean ± SD, n=6. \* and \*\*\* indicate  $p < 0.05$  and  $p < 0.001$  compared with the uninfected group, respectively

### 133 Gross and histopathologic analysis of the spleen

134 The spleen is an important site of erythropoiesis, the clearance of infected RBCs  
135 (iRBCs), and immune system activation in response to blood-stage malaria (17). In  
136 the present study, the body weight of infected mice was observed to decline following  
137 infection with PbK173. The spleen weight of infected groups was observed to  
138 increase beginning at 3 dpi. In response to infection, all mice experienced significant  
139 splenomegaly, but the splenic index was significantly higher in infected BALB/c  
140 mice.

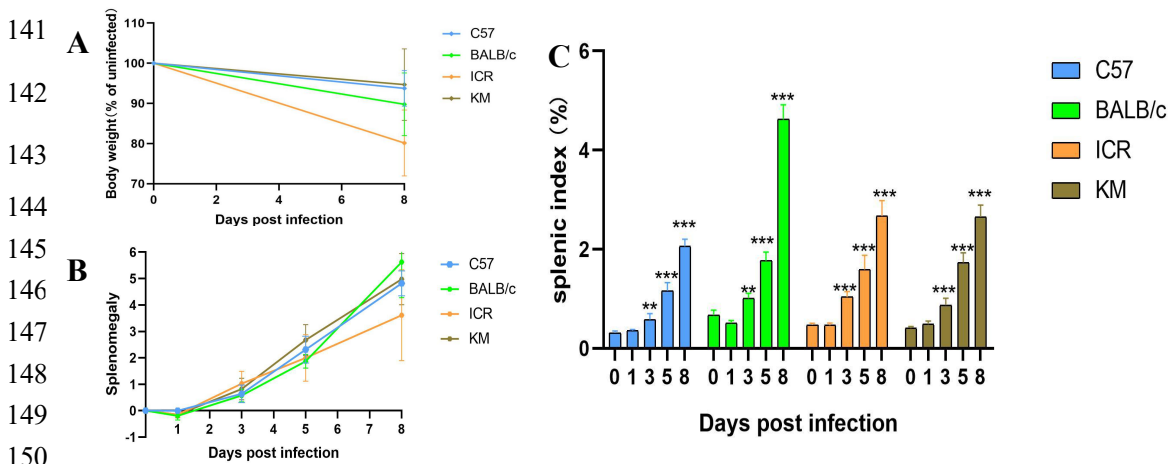

151 FIG 3: The change in body weight (A) and spleen weight (B) in the four strains of  
152 mice, spleen weights were normalized to the weight of uninfected groups (%). C:  
153 Splenic index in uninfected and PbK173 infected mice. Spleen weights of infected  
154 mice were determined on days 3, 5, and 8 post infection. The splenic index was  
155 determined as the ratio of spleen weight to body weight. All data are presented as  
156 mean  $\pm$  SD, n=6. \*\* and \*\*\* indicate statistical significance at  $p < 0.01$  and  $p < 0.001$   
157 compared with the uninfected group, respectively.

158

159

160

161

162

163

164

165

166

167

168  
169  
170  
171  
172  
173  
174  
175  
176  
177  
178  
179  
180  
181  
182  
183  
184  
185  
186  
187  
188  
189  
190  
191  
192  
193  
194  
195  
196  
197  
198  
199  
200  
201  
202  
203  
204

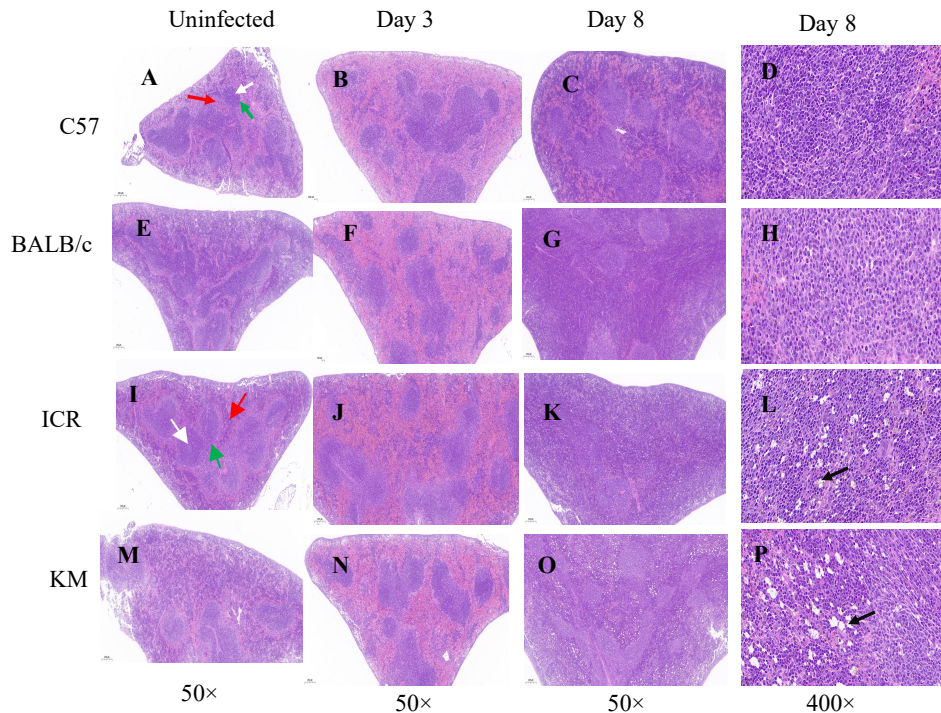

FIG 4: H&E stained sections of spleen from infected or uninfected mice. white arrows: white pulp; red arrows: red pulp; green arrows: marginal zone; black arrows highlight vacuolation.

Figure 4 shows the histopathological sections of the spleen tissue. A clear distinction between the red and white pulp, resting follicles, and marginal zones were evident in the spleen of normal uninfected control mice (Fig. 4: A, E, I, M). Severe congestion and enlarged red pulp was observed in spleens of infected mice at 3 dpi (Fig. 4: B, F, J, N). To a similar all mouse strains examined, increases in red and white pulp cellularity was observed, and the clear marginal zones surrounding follicles became inapparent (except in C57BL/6) at 8 dpi (Fig. 4: C, G, K, O). Furthermore, extensive vacuolation in the red pulp at 8 dpi was observed in spleens from ICR and KM mice (Fig. 4: L, P).





242 cells in the spleen.

### 243 Analysis of Splenocyte Subsets

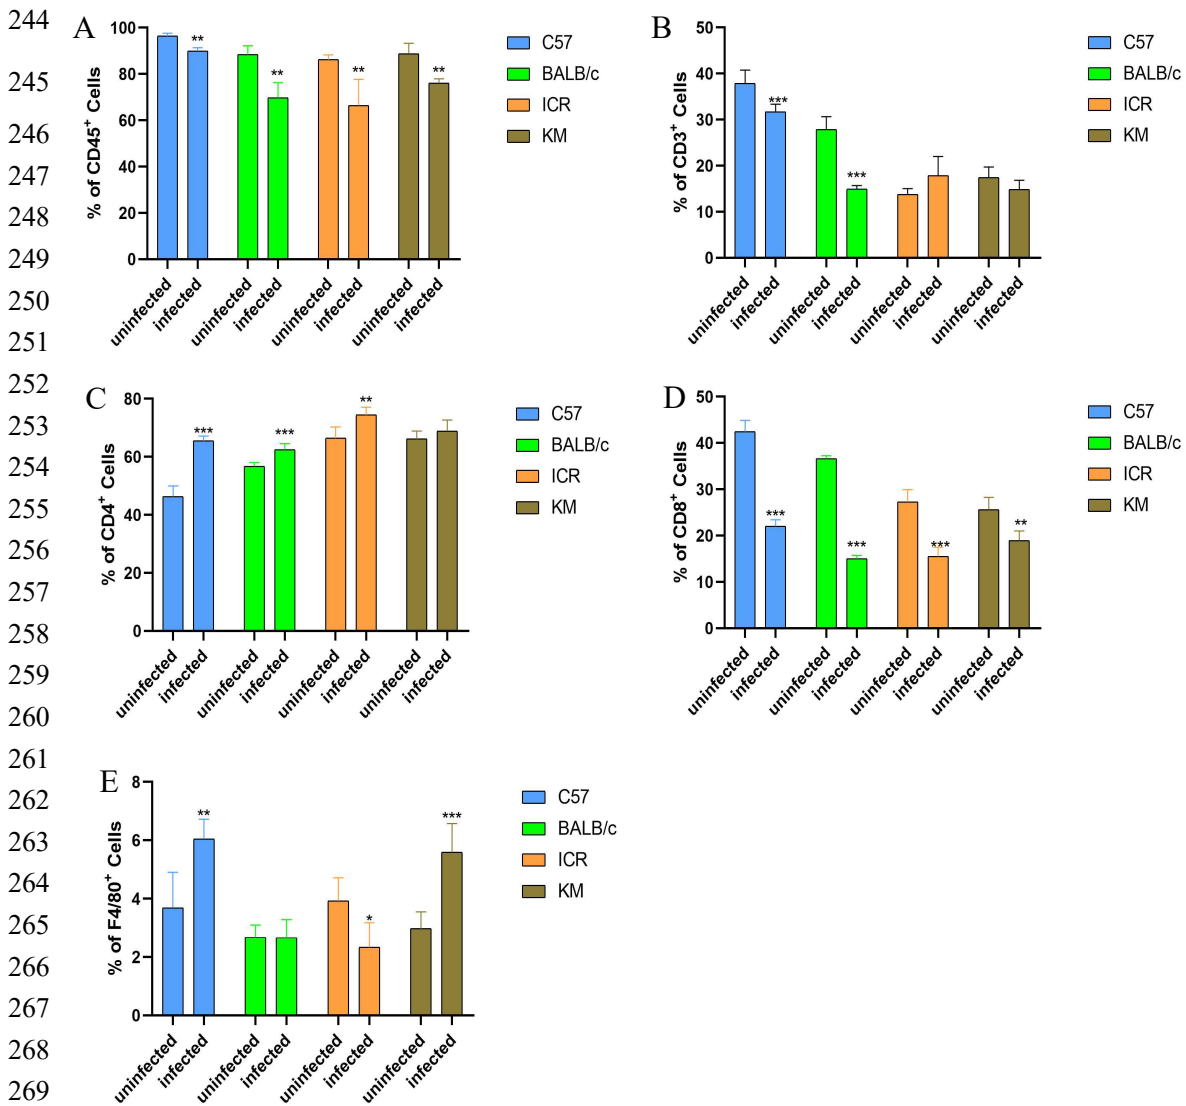

271 FIG 6: Flow cytometry analysis of splenocyte subsets at 8 dpi. Splenocytes of mice  
272 infected with parasites were incubated with the required antibodies according to the  
273 manufacturer's protocol for antibody dilution, incubation duration, etc., and were  
274 analyzed in a CytoFLEX flow cytometer. \*, \*\* and \*\*\* indicate statistical  
275 significance at  $p < 0.05$ ,  $p < 0.01$  and  $p < 0.001$  compared with the uninfected group,  
276 respectively.

277

278 Next, the distribution of macrophage and T lymphocyte subpopulations were  
279 analyzed. Using single-cell suspensions from PbK173 infected or uninfected control  
280 spleens, flow cytometry was performed to quantify total leukocytes (CD45<sup>+</sup> cells),  
281 total T lymphocytes (CD45<sup>+</sup>CD3<sup>+</sup> cells), T cell subsets (CD4<sup>+</sup> and CD8<sup>+</sup> cells), and

282 monocytes/macrophages (CD45<sup>+</sup>F4/80<sup>+</sup> cells) (Fig. 6). A significant decrease in total  
283 leukocyte in both C57BL/6, BALB/c, ICR and KM infected mice ( $p < 0.01$ ) was  
284 observed (Fig. 6A). The data also indicated a significant decrease in the percentages  
285 of the T lymphocytes (CD3<sup>+</sup> cells, except ICR and KM infected mice) (Fig. 6B) and  
286 CD8<sup>+</sup> cells (Fig. 6D), while the percentages of CD4<sup>+</sup> cells (Fig. 6C) in both C57BL/6,  
287 BALB/c, ICR and KM infected mice increased.

288 The trends in macrophage percentages differed between the 4 strains of mice. The  
289 percentage of macrophages did not change significantly in BALB/c infected mice. A  
290 decrease in the percentage of macrophages was however observed in the infected ICR  
291 mice. Conversely, a significant increase in the percentages of the macrophages in  
292 C57BL/6 and KM infected mice as compared to uninfected mice was observed (Fig.  
293 6E).

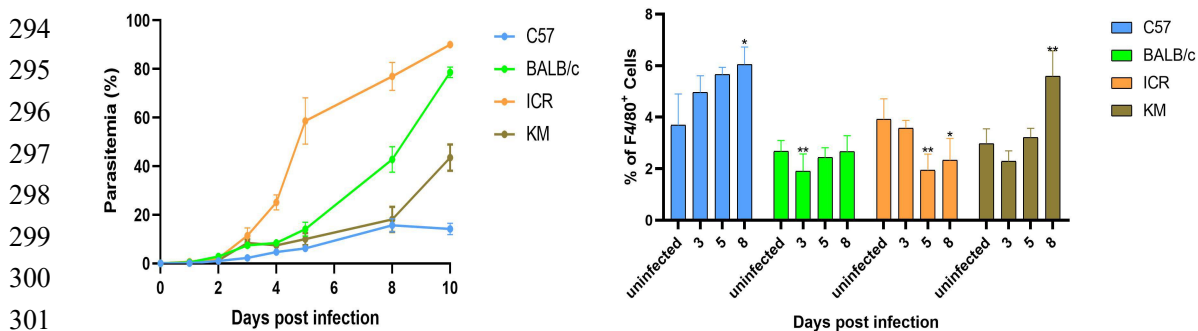

302 FIG 7: Parasitemia and flow cytometry analysis of macrophages in C57BL/6, BALB/c,  
303 ICR and KM mice over the course of PbK173 infection. \* and \*\* indicate  $p < 0.05$ ,  $p$   
304  $< 0.01$  compared with the uninfected group, respectively.  
305

306 Splenic red pulp macrophages, located between the splenic cords and venous  
307 sinuses, are well positioned to clear iRBCs and are important for controlling  
308 blood-stage malaria (18). In the present study, after infection with PbK173, the  
309 percentages of macrophages in the spleen of C57BL/6 mice exhibited the greatest  
310 increase of all the mouse strains (Fig. 7B), and the parasitemia progressed the slowest  
311 compared to the other mouse strains (Fig. 7A).

312 The percentage of macrophages in the spleen of KM mice was higher than  
313 uninfected group on 8 dpi. The spleens in KM mice exhibited structural  
314 disorganization and remodeling, which likely affected the mechanical retention  
315 threshold. As a result, only late trophozoite stages were retained, which led to a

316 significantly higher parasitemia in KM than C57BL/6 mice. The percentages of  
317 macrophages in ICR infected mice were lower than uninfected mice, and the  
318 parasitemia was higher than other strains during the course of PbK173 infection (Fig.  
319 7).

320 These data show that the rate of splenic mechanical filtration and the splenic  
321 macrophages may be important factors in determining an individual's total parasite  
322 burden and potentially influencing the pathogenesis of malaria, and different genetic  
323 backgrounds of mice have different mechanisms for controlling malaria infection in  
324 the spleen.

325

## 326 **DISCUSSION**

327 In this study, the survival time of mice infected with PbK173 varied, although the  
328 infection was uniformly lethal. Mice of the C57BL/6 strain were the most resistant,  
329 while ICR mice were the most susceptible. Both BALB/c and KM mice were  
330 intermediate.

331 Changes in blood cell counts are characteristic of plasmodium infection.  
332 Haematological changes during the course of a malaria infection, such as anaemia,  
333 thrombocytopaenia, leukocytosis, and leucopenia are defining. Malaria infections also  
334 induce lymphocytopenia, which is accompanied by an increase in neutrophil count,  
335 and is a sign of systemic inflammation. Neutrophils (also known as  
336 polymorphonuclear cells) are the most common white blood cell in the body (19) and  
337 are one of the immune system's first lines of defense against infection. They can  
338 neutralize pathogens through several mechanisms, including phagocytosis, the  
339 production of reactive oxygen species (ROS) and other antimicrobial products, or by  
340 the formation of neutrophil extracellular traps (NETs) (20). Additionally, they also  
341 play a role in the activation and regulation of the immune response through the  
342 secretion of cytokines and chemokines (21), and the presentation of foreign antigens  
343 (22). A substantial body of work has been conducted to investigate the role of  
344 neutrophils in malaria. It has been determined that during infection, neutrophils are  
345 activated and are capable of clearing malaria parasites by a number of mechanisms.

346 In this experiment, the above hematological parameters of different mouse strains  
347 exhibited similar trends with respect to changes in the parameters, although the  
348 changes in the percentages of monocytes varied. Cells of the monocyte/macrophage  
349 lineage are one of the main sources of cytokines in malaria-infected individuals.  
350 While some of the cytokines may be of importance for parasite clearance (eg, IL-12)  
351 (23), others may be major contributors to disease progression (eg, TNF) (24).  
352 Monocytes recognize *Plasmodium falciparum* biological products and Pf-infected  
353 erythrocytes directly through pattern recognition receptors (PRR) (25), as well as  
354 complement- or IgG-opsonized erythrocytes and parasite components via complement  
355 receptors and Fcγ receptors (26). Activated monocytes have several important effector  
356 functions in the host defense against malaria, including phagocytosis (27), cytokine  
357 production (28), and modulation of adaptive immune responses (29,30). At 5 dpi,  
358 compared with the uninfected groups, the percentages of monocytes in BALB/c and  
359 C57BL/6 mice were elevated, whereas the values in ICR and KM mice were reduced.  
360 Conversely, the parasitemia in ICR mice was significantly higher than KM mice.  
361 These results indicate that perhaps the immune cells in peripheral blood are only part  
362 of the host response necessary to control plasmodium infection.

363 The spleen is a key site for removal of parasitized red blood cells, generation of  
364 immunity and production of new red blood cells during malaria. The importance of  
365 the spleen for the control of malaria was confirmed by studying the response of  
366 splenectomized humans and rodents to infection. Humans with acute *P. falciparum*  
367 malaria who had previously undergone splenectomy had decreased clearance of  
368 iRBCs from the circulation (31). The mice subjected to partial splenectomy presented  
369 a level of parasites similar to that of non-splenectomized mice, while the animals  
370 subjected to full splenectomy had twice the amount of circulating parasites (32).  
371 Furthermore, parasite clearance after drug treatment was delayed in splenectomized  
372 patients, with RBCs containing dead parasites being retained in the circulation for  
373 prolonged periods, compared with individuals with a functional spleen (33).

374 During acute attacks of malaria, splenomegaly is one of the typical signs of malaria,  
375 and the degree of splenomegaly often impacts the host's ability to mount a successful

376 response to the parasite (34). Besides an increase in the organ volume and mass, the  
377 spleen also exhibits structural disorganization and remodeling. These changes include  
378 expansion of the red pulp, transient loss of the marginal zone, increased vasculature,  
379 and activation of barrier cells, which may establish a blood-spleen barrier that can  
380 drastically alter splenic blood circulation (35,13,36). In this study, the spleen index of  
381 infected groups was observed to increase from 3 dpi. Severe congestion and enlarged  
382 red pulp was evident in the infected mice. By 8 dpi, infection-induced increases in red  
383 and white pulp cellularity and the marginal zones surrounding follicles disappeared in  
384 all strains of mice examined. However, the spleens of C57BL/6 and BALB/C infected  
385 mice maintain their structural integrity integrity, although the spleen index of  
386 BALB/C changed the most. The spleen of ICR and KM mice exhibited severe  
387 vacuolation, and the splenic structure was highly atypical, with many of the features  
388 absent at this time. This could be a result of the spleen structures of mice with  
389 different genetic backgrounds possessing different tolerances and pathologies to  
390 infection with malaria.

391 During the erythrocytic stages of malaria infection, the spleen plays a critical role  
392 in the host immune response. Elimination of infected erythrocytes occurs through  
393 activation of cellular and humoral immune responses, and through mechanical  
394 filtration. White and red pulp structures have specific functions in the human spleen.  
395 The white pulp is a major control center for the humoral immune response, especially  
396 to circulating antigens. The red pulp exerts a unique and subtle control of the surface  
397 integrity and biomechanical properties of erythrocytes. To be left in circulation, RBCs  
398 must be fit enough to cross a very specific structure of red pulp sinuses, the  
399 interendothelial slit (IES). Older erythrocytes, or those modified by innate or acquired  
400 conditions, are eventually retained in the splenic red pulp and processed by red pulp  
401 macrophages (RPMs) (37).

402 During asexual replication (including the sequential ring, trophozoite, and schizont  
403 stages), parasite maturation induces changes in the host RBC with novel proteins  
404 synthesis (38,39). As the parasite develops, the infected RBC (iRBC) loses its  
405 biconcave shape and progressively becomes spherical and rigid (40). Furthermore, the

406 surface area-to-volume ratio decreases, the shear elastic modulus of the plasma  
407 membrane, and the cellular viscosity increase (41). The loss of RBC deformability is  
408 not limited to mature stages, but starts soon after parasite invasion. During the ring  
409 stage (within the first 16–24 h after RBC invasion), iRBC undergo up to 9.6% surface  
410 area loss (42,43). The altered deformability of the plasmodium-infected RBC may  
411 result in increased retention in the spleen. More than 50% of ring-iRBC are retained  
412 upon *ex vivo* transfusion through human spleens (43). These retention and  
413 accumulation processes stem from the splenic screening of RBC deformability (44).  
414 However, no direct evidence exists demonstrating the correlation among the rate of  
415 splenic mechanical filtration, macrophages, and infection severity. In this study, at 3  
416 days post PbK173 infection, malaria pigments were observed in the red pulp in great  
417 abundance. The pigments consisted of parasites in the ring and trophozoite stages.

418 In a systemic pathological study of cerebral malaria in African children, enlarged  
419 spleens and abundant malaria pigments in splenic macrophages were observed in the  
420 majority of the 103 fatal cases. These observations point to an important role of the  
421 spleen in parasite control. In this study, the number of macrophages in the spleen of  
422 C57BL/6 mice infected with PbK173 was higher than that in uninfected controls, and  
423 the parasitemia was lower than other strains during. The percentage of macrophages  
424 in the spleen of infected ICR mice was lower than the uninfected group, and the  
425 parasitemia increased the fastest. During the infection period, the ratio of  
426 macrophages in the spleen of BALB/c mice was not significantly different from that  
427 of the uninfected group. The growth rate of the parasitemia was lower than in ICR  
428 mice, but higher than that of C57BL/6 mice. This can be explained by the fact that  
429 macrophages complement the filtering function of the spleen to control parasitic  
430 infections.

431 Artemisinin-based combination therapies (ACTs) are the standard of care to treat  
432 uncomplicated falciparum malaria. However, resistance to artemisinins was first  
433 reported through observations of a 100-fold reduction in parasite clearance rate in  
434 Pailin, Western Cambodia, in 2009 (45). The clearance rate is defined as a parasite

435 clearance half-life  $\geq 5$  hours following treatment with artesunate monotherapy or an  
436 ACT (46). Unfortunately, this has become a common issue in Southeast Asia (SEA).  
437 Artemisinin resistance has been associated in with multiple nonsynonymous single  
438 nucleotide polymorphisms (NS-SNPs) in the propeller domain of the gene encoding  
439 the *P. falciparum* K13 protein (K13PD) (47,48). In Africa, significantly prolonged  
440 clearance has yet to be observed (49).

441 The delayed clearance phenotype initially observed in SEA does not represent  
442 “drug resistance” in the traditional use of the term. Antimicrobial drug resistance is  
443 typically defined by quantifiable shifts in the cytostatic or cytotoxic potency of the  
444 antimicrobial drug. It is important to emphasize that as a 3-day course of artemisinin  
445 has never been considered a curative regimen. Artemisinins remain effective, even if  
446 they require a longer treatment course or other modifications to the  
447 combination-treatment regimen (50). It is not clear if a delay in parasite clearance  
448 with artemisinin treatments be defined as drug “resistance.”

449 The spleen controls malaria infection by removing the plasmodium from the blood.  
450 Splenic functions of mice with different genetic backgrounds vary, and when  
451 splenomegaly occurs after malaria infection, the prognosis is not favorable. However,  
452 it is not clear if splenomegaly affects the organ’s ability to clear parasites from the  
453 blood.

454 In summary, the filtering function of the spleen and the expression of macrophages  
455 may also be involved in the control of malaria infection. Mice with different genetic  
456 backgrounds have different filtering functions in the spleen from the expression of  
457 macrophages. The tolerance is also different, which may be the reason for the  
458 differential susceptibility of different strains of mice to PbK173.

459

## 460 **MATERIALS AND METHODS**

### 461 **Parasite strains and culturing conditions**

462 *Plasmodium berghei* K173, a gift from Dr. Dai of Chengdu University of TCM,  
463 was serially passaged *in vivo* in mice. Infected blood was harvested at day 5–7  
464 post-infection and stored as frozen stabilates in Alsever’s solution containing 10%



465 glycerol.

#### 466 **Mice and infection**

467 Male C57BL/6, BALB/C, ICR, and KM wild-type (WT) mice (18~22g,) were used  
468 in this study. Animals were purchased from Weitonglihua (Beijing, China). A total of  
469 6 mice per group were infected intraperitoneally with  $10^7$  PbK173-infected RBCs and  
470 were provided water and standard laboratory mouse chow diet *ad libitum* throughout  
471 the experiment. All mice were housed in pathogen-free animal facilities at the  
472 Institute of Chinese Materia Medica, China Academy of Chinese Medical Sciences.

#### 473 **Measurement of hematologic parameters and parasitemia**

474 Complete blood counts were obtained with a XN-1000V [ B<sub>1</sub> ] blood analyzer  
475 (Sysmex, Japan). Parasitemia (i.e., the percentage of infected RBCs) was assessed at  
476 each time point by microscopic counts of thin blood smears stained with Giemsa  
477 solution (Sigma -Aldrich, USA).

#### 478 **Isolation of immune cells from mouse spleen**

479 Spleen samples were surgically removed and weighed in a sterile hood. One part of  
480 each spleen sample was removed and fixed 4% paraformaldehyde for histopathologic  
481 examination, and the remainder was used for isolation of splenocytes.

482 Splens harvested under aseptic conditions were ground into small pieces and  
483 passed through a sterilized 200 mesh to prepare crude splenocyte suspensions at room  
484 temperature. Samples were then centrifuged at 1000 rpm for 8 min at 4 °C, and the  
485 remaining splenocyte suspension was re-suspended in red blood cell Lysis Buffer  
486 (Thermo Fisher Scientific, USA). After a 10 min treatment, 1× PBS was added to  
487 dilute the samples, and then centrifuged at 1000 rpm for 8 min at 4 °C. The pelleted  
488 splenocytes in each group were washed twice and adjusted to concentrations of  $5 \times$   
489  $10^6$  cells/mL with 1× PBS.

#### 490 **Analysis of Splenocyte Subsets**

491 The single cell splenocyte suspensions were stained with the following anti-mouse  
492 antibodies: CD45-KO525, CD3-FITC, CD4-PC5.5, CD8-APC, and F4/80-PE  
493 (Proteintech Group, USA). Splenocytes were incubated with monoclonal antibodies in

494 the dark for 30 min at 4 °C . According to the manufacturer's instructions, the  
495 specificity of labeling was confirmed by isotype-matched antibody staining controls.  
496 The labeled cells were analyzed using a CytoFLEX flow cytometer (Beckman coulter,  
497 USA).

#### 498 **Histological examination**

499 Spleen tissues were fixed in 4% paraformaldehyde, dehydrated through graded  
500 alcohol, embedded in paraffin, sectioned at a thickness of 3 μm, and then stained with  
501 hematoxylin & eosin (H&E) and Giemsa solution according to standard procedures.  
502 Then, the stained slides were mounted in neutral balsam and covered with coverslips.  
503 Histopathologic changes were observed by light microscopy (BX43F Olympus,  
504 Japan).

#### 505 **Statistical Analysis**

506 Data were analyzed using SPSS 19.0 (IBM,USA) and reported as mean ± SD.  
507 Significant differences between groups were analyzed using one-way ANOVA, and  
508 are designated as follows: \*  $p < 0.05$ , \*\*  $p < 0.01$  and \*\*\*  $p < 0.001$  relative to the  
509 uninfected control groups. Survival curves were calculated using GraphPad Prism 8.0  
510 (GraphPad Software,USA).

511

#### 512 **ETHIC STATEMENT**

513 Experimental protocols were approved by the Laboratory Animal Ethics Committee  
514 of the Institute of Chinese Materia Medica, China Academy of Chinese Medical  
515 Sciences (license number SCXK 2016-0006).

516

#### 517 **ACKNOWLEDGMENTS**

518 This research was funded by the National Natural Science Foundation of China  
519 (81641002 and 81841001). We gratefully acknowledge the help from researchers at  
520 the Tang Center for Herbal Medicine Research for providing experiment guidance.  
521 We would also like to thank Dr. Dai from Chengdu University of TCM for providing  
522 the *Plasmodium berghei* K173 and providing technical guidance.

523

524 **REFERENCES**

- 525 1. World Health Organization. World malaria report 2019[M]. Geneva:WHO  
526 Press,2019.
- 527 2. Manjurano A, Sepúlveda N, Nadjm B, Mtove G, Wangai H, Maxwell C, Olomi R,  
528 Reyburn H, Drakeley CJ, Riley EM, Clark TG, & in Collaboration With  
529 MalariaGEN. 2015. USP38, FREM3, SDC1, DDC, and LOC727982 Gene  
530 Polymorphisms and Differential Susceptibility to Severe Malaria in Tanzania. The  
531 Journal of infectious diseases, 212(7), 1129–1139. [https://doi.org/10.1093/infdis/  
532 jiv192](https://doi.org/10.1093/infdis/jiv192).
- 533 3. Duffy F, Bernabeu M, Babar PH, Kessler A, Wang CW, Vaz M, Chery L, Mandala  
534 WL, Rogerson SJ, Taylor TE, Seydel KB, Lavstsen T, Gomes E, Kim K, Lusingu  
535 J, Rathod PK, Aitchison JD, Smith JD. 2019. Meta-analysis of Plasmodium  
536 falciparum var Signatures Contributing to Severe Malaria in African Children  
537 and Indian Adults. mBio, 10(2), e00217-19. [https://doi.org/10.1128/mBio.  
539 00217-19](https://doi.org/10.1128/mBio.<br/>538 00217-19).
- 539 4. Siao MC, Borner J, Perkins SL, Deitsch KW, Kirkman LA. 2020. Evolution of  
540 Host Specificity by Malaria Parasites through Altered Mechanisms Controlling  
541 Genome Maintenance. mBio, 11(2), e03272-19. [https://doi.org/10.1128/mBio.  
543 03272-19](https://doi.org/10.1128/mBio.<br/>542 03272-19).
- 543 5. Mackinnon MJ, Mwangi TW, Snow RW, Marsh K, Williams TN. 2005.  
544 Heritability of malaria in Africa. PLoS medicine, 2(12), e340.  
545 <https://doi.org/10.1371/journal.pmed.0020340>.
- 546 6. White NJ. 2017. Malaria parasite clearance. Malaria journal, 16(1), 88. [https://doi.  
548 org/10.1186/s12936-017-1731-1](https://doi.<br/>547 org/10.1186/s12936-017-1731-1).
- 548 7. Aogo RA, Khoury DS, Cromer D, Elliott T, Akter J, Fogg LG, Nair AS, Liligeto  
549 UN, Soon M, Thomas BS, Pernold C, Romanczuk AS, Laohamonthonkul P,  
550 Haque A, Davenport MP. 2018. Quantification of host-mediated parasite clearance  
551 during blood-stage Plasmodium infection and anti-malarial drug treatment in mice.  
552 International journal for parasitology, 48(12), 903–913. [https://doi.org/10.1016/j.  
554 ijpara.2018.05.010](https://doi.org/10.1016/j.<br/>553 ijpara.2018.05.010).
- 554 8. Crosby WH. Normal functions of the spleen relative to red blood cells: a review.  
555 Blood. 1959;14:399–408.
- 556 9. Nathan DG. 1969. Rubbish in the red cell. The New England journal of medicine,  
557 281(10), 558–559. <https://doi.org/10.1056/NEJM196909042811013>
- 558 10. Finch CA, Harker LA, Cook JD. 1977. Kinetics of the formed elements of human  
559 blood. Blood, 50(4), 699–707.
- 560 11. Groom AC, Schmidt EE, MacDonald IC. 1991. Microcirculatory pathways and  
561 blood flow in spleen: new insights from washout kinetics, corrosion casts, and  
562 quantitative intravital videomicroscopy. Scanning microscopy, 5(1), 159–174.
- 563 12. Buffet PA, Milon G, Brousse V, Correas JM, Dousset B, Couvelard A,  
564 Kianmanesh R, Farges O, Sauvanet A, Paye F, Ungeheuer MN, Ottone C, Khun H,  
565 Fiette L, Guigon G, Huerre M, Mercereau-Puijalon O, David PH. 2006. Ex vivo  
566 perfusion of human spleens maintains clearing and processing functions. Blood,  
567 107(9), 3745–3752. <https://doi.org/10.1182/blood-2005-10-4094>.

- 568 13. Safeukui I, Correias JM, Brousse V, Hirt D, Deplaine G, Mulé S, Lesurtel M,  
569 Goasguen N, Sauvanet A, Couvelard A, Kerneis S, Khun H, Vigan-Womas I,  
570 Ottone C, Molina TJ, Tréluyer JM, Mercereau-Puijalon O, Milon G, David P H,  
571 Buffet P A. 2008. Retention of Plasmodium falciparum ring-infected erythrocytes  
572 in the slow, open microcirculation of the human spleen. *Blood*, 112(6), 2520–2528.  
573 <https://doi.org/10.1182/blood-2008-03-146779>.
- 574 14. Mohandas, N, Gallagher PG. 2008. Red cell membrane: past, present, and future.  
575 *Blood*, 112(10), 3939–3948. <https://doi.org/10.1182/blood-2008-07-161166>.
- 576 15. Groom C, Schmidt EE, MacDonald IC. 1991. Microcirculatory pathways and  
577 blood flow in spleen: new insights from washout kinetics, corrosion casts, and  
578 quantitative intravital videomicroscopy. *Scanning microscopy*, 5(1), 159–174.
- 579 16. Berens-Riha N, Kroidl I, Schunk M, Alberer M, Beissner M, Pritsch M, Kroidl A,  
580 Fröschl G, Hanus I, Bretzel G, von Sonnenburg F, Nothdurft HD, Löscher T,  
581 Herbinger KH. 2014. Evidence for significant influence of host immunity on  
582 changes in differential blood count during malaria. *Malaria journal*, 13, 155.  
583 <https://doi.org/10.1186/1475-2875-13-155>.
- 584 17. Lamikanra AA, Brown D, Potocnik A, Casals-Pascual C, Langhorne J, Roberts  
585 DJ. 2007. Malarial anemia: of mice and men. *Blood*, 110(1), 18–28. <https://doi.org/10.1182/blood-2006-09-018069>.
- 587 18. Borges da Silva H, Fonseca R, Pereira RM, Cassado A, Álvarez JM, D'Império  
588 Lima MR. 2015. Splenic Macrophage Subsets and Their Function during Blood-  
589 Borne Infections. *Frontiers in immunology*, 6, 480. <https://doi.org/10.3389/fimmu.2015.00480>.
- 591 19. Hsieh MM, Everhart JE, Byrd-Holt DD, Tisdale JF, & Rodgers GP. 2007.  
592 Prevalence of neutropenia in the U.S. population: age, sex, smoking status, and  
593 ethnic differences. *Annals of internal medicine*, 146(7), 486–492. <https://doi.org/10.7326/0003-4819-146-7-200704030-00004>.
- 595 20. Kolaczowska E, Kubes P. 2013. Neutrophil recruitment and function in health  
596 and inflammation. *Nature reviews. Immunology*, 13(3), 159–175. <https://doi.org/10.1038/nri3399>.
- 598 21. Tecchio C, Cassatella MA. 2016. Neutrophil-derived chemokines on the road to  
599 immunity. *Seminars in immunology*, 28(2), 119–128. <https://doi.org/10.1016/j.smim.2016.04.003>.
- 601 22. Lin A, Loré K. 2017. Granulocytes: New Members of the Antigen-Presenting Cell  
602 Family. *Frontiers in immunology*, 8, 1781. <https://doi.org/10.3389/fimmu.2017.01781>.
- 604 23. Malaguarnera L, Pignatelli S, Musumeci M, Simporè J, Musumeci S. 2002.  
605 Plasma levels of interleukin-18 and interleukin-12 in Plasmodium falciparum  
606 malaria. *Parasite immunology*, 24(9-10), 489–492. <https://doi.org/10.1046/j.1365-3024.2002.00485.x>.
- 608 24. Schofield L, Hackett F. 1993. Signal transduction in host cells by a  
609 glycosylphosphatidylinositol toxin of malaria parasites. *The Journal of  
610 experimental medicine*, 177(1), 145–153. <https://doi.org/10.1084/jem.177.1.145>.
- 611 25. Gazzinelli RT, Denkers EY. 2006. Protozoan encounters with Toll-like receptor

- 612 signalling pathways: implications for host parasitism. *Nature reviews.*  
613 *Immunology*, 6(12), 895–906. <https://doi.org/10.1038/nri1978>.
- 614 26. Silver KL, Higgins SJ, McDonald CR, Kain KC. 2010. Complement driven innate  
615 immune response to malaria: fuelling severe malarial diseases. *Cellular microbio-*  
616 *logy*, 12(8), 1036–1045. <https://doi.org/10.1111/j.1462-5822.2010.01492.x>.
- 617 27. Ayi K, Patel SN, Serghides L, Smith TG, Kain KC. 2005. Nonopsonic  
618 phagocytosis of erythrocytes infected with ring-stage *Plasmodium falciparum*.  
619 *Infection and immunity*, 73(4), 2559–2563. [https://doi.org/10.1128/IAI.73.4.2559](https://doi.org/10.1128/IAI.73.4.2559-2563.2005)  
620 [-2563.2005](https://doi.org/10.1128/IAI.73.4.2559-2563.2005).
- 621 28. Gowda DC. 2007. TLR-mediated cell signaling by malaria GPIs. *Trends in*  
622 *parasitology*, 23(12), 596–604. <https://doi.org/10.1016/j.pt.2007.09.003>.
- 623 29. Scholzen A, Teirlinck AC, Bijker EM, Roestenberg M, Hermsen CC, Hoffman SL,  
624 Sauerwein RW. 2014. BAFF and BAFF receptor levels correlate with B cell  
625 subset activation and redistribution in controlled human malaria infection. *Journal*  
626 *of immunology (Baltimore, Md. : 1950)*, 192(8), 3719–3729. [https://doi.org/10.](https://doi.org/10.4049/jimmunol.1302960)  
627 [4049/jimmunol.1302960](https://doi.org/10.4049/jimmunol.1302960).
- 628 30. Dobbs KR, Crabtree JN, Dent AE. 2020. Innate immunity to malaria-The role of  
629 monocytes. *Immunological reviews*, 293(1), 8–24. [https://doi.org/10.1111/imr.](https://doi.org/10.1111/imr.12830)  
630 [12830](https://doi.org/10.1111/imr.12830).
- 631 31. Looareesuwan S, Suntharasamai P, Webster HK, Ho M. 1993. Malaria in  
632 splenectomized patients: report of four cases and review. *Clinical infectious*  
633 *diseases: an official publication of the Infectious Diseases Society of America*,  
634 16(3), 361–366. <https://doi.org/10.1093/clind/16.3.361>.
- 635 32. Negreiros RM, Makimoto FH, Santana LL, Ferreira LC, Nakajima GS, Santos  
636 MC. 2009. Experimental splenectomies and malaria in mice. *Acta cirurgica*  
637 *brasileira*, 24(6), 437–441. <https://doi.org/10.1590/s0102-86502009000600003>.
- 638 33. Chotivanich K, Udomsangpetch R, McGready R, Proux S, Newton P,  
639 Pukrittayakamee S, Looareesuwan S, White NJ. 2002. Central role of the spleen in  
640 malaria parasite clearance. *The Journal of infectious diseases*, 185(10), 1538–1541.  
641 <https://doi.org/10.1086/340213>.
- 642 34. Cadman ET, Abdallah AY, Voisine C, Sponaas AM, Corran P, Lamb T, Brown D,  
643 Ndungu F, Langhorne J. 2008. Alterations of splenic architecture in malaria are  
644 induced independently of Toll-like receptors 2, 4, and 9 or MyD88 and may affect  
645 antibody affinity. *Infection and immunity*, 76(9), 3924–3931. [https://doi.org/10.](https://doi.org/10.1128/IAI.00372-08)  
646 [1128/IAI.00372-08](https://doi.org/10.1128/IAI.00372-08).
- 647 35. Urban BC, Hien TT, Day NP, Phu NH, Roberts R, Pongponratn E, Jones M, Mai  
648 NT, Bethell D, Turner GD, Ferguson D, White NJ, Roberts DJ. 2005. Fatal  
649 *Plasmodium falciparum* malaria causes specific patterns of splenic architectural  
650 disorganization. *Infection and immunity*, 73(4), 1986–1994. [https://doi.org/10.](https://doi.org/10.1128/IAI.73.4.1986-1994.2005)  
651 [1128/IAI.73.4.1986-1994.2005](https://doi.org/10.1128/IAI.73.4.1986-1994.2005).
- 652 36. Huang X, Huang S, Ong LC, Lim JC, Hurst RJ, Mushunje AT, Matsudaira PT,  
653 Han J, Preiser PR. 2015. Differential Spleen Remodeling Associated with  
654 Different Levels of Parasite Virulence Controls Disease Outcome in Malaria  
655 Parasite Infections. *mSphere*, 1(1), e00018-15.

- 656 <https://doi.org/10.1128/mSphere.00018-15>.
- 657 37. Buffet PA, Safeukui I, Deplaine G, Brousse V, Prendki V, Thellier M, Turner GD,  
658 Mercereau-Puijalon O. 2011. The pathogenesis of Plasmodium falciparum malaria  
659 in humans: insights from splenic physiology. *Blood*, 117(2), 381–392.  
660 <https://doi.org/10.1182/blood-2010-04-202911>.
- 661 38. Gilson PR, Chisholm SA, Crabb BS, de Koning-Ward TF. 2017. Host cell  
662 remodelling in malaria parasites: a new pool of potential drug targets.  
663 *International journal for parasitology*, 47(2-3), 119–127.  
664 <https://doi.org/10.1016/j.ijpara.2016.06.001>.
- 665 39. Ndour PA, Larréché S, Mouri O, Argy N, Gay F, Roussel C, Jauréguiberry S,  
666 Perillaud C, Langui D, Biligui S, Chartrel N, Mérens A, Kendjo E, Ghose A,  
667 Hassan M, Hossain MA, Kingston H, Plewes K, Dondorp AM, Danis M, French  
668 Artesunate Working Group 2017. Measuring the Plasmodium falciparum HRP2  
669 protein in blood from artesunate-treated malaria patients predicts post-artesunate  
670 delayed hemolysis. *Science translational medicine*, 9(397), eaaf9377.  
671 <https://doi.org/10.1126/scitranslmed.aaf9377>.
- 672 40. Cranston HA, Boylan CW, Carroll GL, Sutera SP, Williamson JR, Gluzman IY,  
673 Krogstad DJ. 1984. Plasmodium falciparum maturation abolishes physiologic red  
674 cell deformability. *Science (New York, N.Y.)*, 223(4634), 400–403.  
675 <https://doi.org/10.1126/science.6362007>.
- 676 41. Herricks T, Antia M, Rathod PK. 2009. Deformability limits of Plasmodium  
677 falciparum-infected red blood cells. *Cellular microbiology*, 11(9), 1340–1353.  
678 <https://doi.org/10.1111/j.1462-5822.2009.01334.x>.
- 679 42. Safeukui I, Buffet PA, Perrot S, Sauvanet A, Aussilhou B, Dokmak S, Couvelard  
680 A, Hatem DC, Mohandas N, David PH, Mercereau-Puijalon O, Milon G. 2013.  
681 Surface area loss and increased sphericity account for the splenic entrapment of  
682 subpopulations of Plasmodium falciparum ring-infected erythrocytes. *PloS one*,  
683 8(3), e60150. <https://doi.org/10.1371/journal.pone.0060150>.
- 684 43. Jauréguiberry S, Ndour PA, Roussel C, Ader F, Safeukui I, Nguyen M, Biligui S,  
685 Ciceron L, Mouri O, Kendjo E, Bricaire F, Vray M, Angoulvant A, Mayaux J,  
686 Haldar K, Mazier D, Danis M, Caumes E, Thellier M, Buffet P, French Artesunate  
687 Working Group 2014. Postartesunate delayed hemolysis is a predictable event  
688 related to the lifesaving effect of artemisinin. *Blood*, 124(2), 167–175.  
689 <https://doi.org/10.1182/blood-2014-02-555953>.
- 690 44. Depond M, Henry B, Buffet P, Ndour PA. 2020. Methods to Investigate the  
691 Deformability of RBC During Malaria. *Frontiers in physiology*, 10, 1613.  
692 <https://doi.org/10.3389/fphys.2019.01613>.
- 693 45. Dondorp AM, Nosten F, Yi P, Das D, Phyto AP, Tarning J, Lwin KM, Ariey F,  
694 Hanpithakpong W, Lee SJ, Ringwald P, Silamut K, Imwong M, Chotivanich K,  
695 Lim P, Herdman T, An SS, Yeung S, Singhasivanon P, Day NP, White NJ. 2009.  
696 Artemisinin resistance in Plasmodium falciparum malaria. *The New England  
697 journal of medicine*, 361(5), 455–467. <https://doi.org/10.1056/NEJMoa0808859>.
- 698 46. World Health Organization [20 January 2016]. Update on artemisinin and ACT  
699 resistance - September 2015.

- 700 47. Conrad MD, Nsohya SL, Rosenthal PJ. 2019. The Diversity of the Plasmodium  
701 falciparum K13 Propeller Domain Did Not Increase after Implementation of  
702 Artemisinin-Based Combination Therapy in Uganda. *Antimicrobial agents and*  
703 *chemotherapy*, 63(10), e01234-19. <https://doi.org/10.1128/AAC.01234-19>.
- 704 48. Straimer J, Gnädig NF, Stokes BH, Ehrenberger M, Crane AA, Fidock DA. 2017.  
705 Plasmodium falciparum K13 Mutations Differentially Impact Ozonide  
706 Susceptibility and Parasite Fitness In Vitro. *mBio*, 8(2), e00172-17.  
707 <https://doi.org/10.1128/mBio.00172-17>.
- 708 49. Silva M, Ferreira PE, Otienoburu SD, Calçada C, Ngasala B, Björkman A,  
709 Mårtensson A, Gil JP, Veiga MI. 2019. Plasmodium falciparum K13 expression  
710 associated with parasite clearance during artemisinin-based combination therapy.  
711 *The Journal of antimicrobial chemotherapy*, 74(7), 1890–1893.  
712 <https://doi.org/10.1093/jac/dkz098>
- 713 50. Wang J, Xu C, Liao FL, Jiang T, Krishna S, Tu Y. 2019. A Temporizing Solution  
714 to "Artemisinin Resistance". *The New England journal of medicine*, 380(22),  
715 2087–2089. <https://doi.org/10.1056/NEJMp1901233>.
